# Supplementary material for: Change in Physical Activity and Sitting Time After Myocardial Infarction and Mortality Among Postmenopausal Women in the Women's Health Initiative‐Observational Study
Source: PubMed Central journal article supplement — J Am Heart Assoc. 2017 May 15;6(5):e005354. doi: 10.1161/JAHA.116.005354 (PMC5524089; doi:10.1161/jaha.116.005354), 2017-05-15
Supplement: JAH3-6-e005354-s001.pdf [file JAH3-6-e005354-s001.pdf]

# **SUPPLEMENTAL MATERIAL**

**Table S1.** Means and standard deviations of physical activity (PA) pre- and post-myocardial infarction (MI) in MET-hrs/wk by categories of change in PA.

|                           | <b>N</b> | <b>Mean</b> | <b>Std. Dev.</b> |
|---------------------------|----------|-------------|------------------|
| <b>Maintained low PA</b>  |          |             |                  |
| Pre-MI PA                 | 296      | 2.62        | 2.23             |
| Post-MI PA                | 296      | 2.02        | 2.19             |
| <b>Decreased PA</b>       |          |             |                  |
| Pre-MI PA                 | 123      | 15.33       | 7.87             |
| Post- MIPA                | 123      | 3.01        | 2.44             |
| <b>Increased PA</b>       |          |             |                  |
| Pre-MI PA                 | 111      | 3.47        | 2.34             |
| Post- MI PA               | 111      | 14.47       | 7.32             |
| <b>Maintained high PA</b> |          |             |                  |
| Pre-MI PA                 | 326      | 20.65       | 12.00            |
| Post-MI PA                | 326      | 19.74       | 11.25            |

**Table S2.** Hazard ratios (HR) and 95% confidence intervals (CI) for all-cause, coronary heart disease (CHD), and cardiovascular disease (CVD) mortality in relation to conditional relative physical activity.

|                                | Age-adjusted                                                         | Multivariable-adjusted* |
|--------------------------------|----------------------------------------------------------------------|-------------------------|
| <b>Conditional Relative PA</b> | <b>HR (95% CI) for a 1 MET-hr/week Increase in Physical Activity</b> |                         |
| <i>All-Cause Mortality</i>     | 0.96 (0.95-0.98)                                                     | 0.97 (0.95-0.99)        |
| <i>CHD Mortality</i>           | 0.92 (0.89-0.96)                                                     | 0.93 (0.90-0.97)        |
| <i>CVD Mortality</i>           | 0.96 (0.93-0.98)                                                     | 0.97 (0.95-0.99)        |

\* Adjusted for age (stratified), education, race, income (updated), marital status (updated), hormone replacement therapy use, physical function, congestive heart failure (updated), depression, family history MI, cigarette smoking (updated), sleep, alcohol drinks per week, age a menopause, Healthy Eating Index 2005, and sitting time
